# Supplementary material for: Formation of nano-CdS solid solution: A mechanism for Cd enrichment in sphalerite
Source: publisher site journal article supplement (doi:10.2138/am-2024-9524), 2025-01-02
Supplement: Supplementary file 1 [file AMMIN-9524_suppS1.xlsx]

## Sheet: Sheet1
American Mineralogist: August 2025 Online Materials AM-25-89524
YAN ET AL.: NANO-CDS SOLID SOLUTION FORMATION AND ITS ROLE IN SPHALERITE
Supplementary Table S1 Trace element compositions (ppm) of sphalerite analyzed by LA-ICP-MS from Jinding Pb-Zn deposit
Test Point	Zn(wt.%)	Cd	Fe	Pb	Mn	Cu	Ga	Ge	As	Ag	In	Sn	Sb	Tl
JD-1349-1	54.2336	31697.6	1750.03	517.656	71.5049	15.82	7.11707	19.5578	74.7224	9.18777	0.355782	0.198986	1.34281	24.7621
JD-1349-2	53.5946	39044.4	322.321	281.91	7.42479	3.85596	2.58792	1.40603	2.20565	4.02929	0.00334743	0.139781	0.163209	2.03724
JD-1349-3	54.2075	34765.2	195.855	235.041	5.43785	1.48028	4.50648	0.552706	0.739987	4.47062	0	0.198992	0.265674	3.96801
JD-1349-4	55.3895	20172	53.8913	67.9881	1.44064	0.184634	3.06836	0.548509	0.63193	1.38124	0.00118537	0.211852	0.113435	1.16645
JD-1349-5	53.8606	40105.2	298.44	366.572	8.46481	3.04934	3.03181	1.36211	1.80779	5.61436	0	0.0533485	0.325187	2.81788
JD-1349-6	53.6538	40411.3	479.37	463.769	12.8581	4.53306	1.34808	0.721451	2.49324	5.24865	0.0128905	0.0861911	0.183247	4.93386
JD-1349-7	55.677	15314.5	79.6839	96.2641	2.56241	0.166339	2.22971	0.825626	0.281165	1.06124	0	0.115484	0.168144	1.98437
JD-1349-8	54.3938	27005.6	37.1874	177.53	3.01014	54.2971	1.55259	2.12546	0.921671	131.147	0.0042064	0.141219	0.769217	2.36713
JD-1349-9	53.1061	40513.2	386.346	482.447	14.7367	7.10753	2.07621	1.0132	3.33922	6.4753	0	0.151827	0.666052	3.25872
JD-1349-10	54.1846	25724.6	157.249	212.136	3.74505	0.167013	1.66641	1.06281	0.567449	1.11302	0.00661387	0.142646	0.219906	1.62722
JD-1349-11	55.1395	13900.4	68.1368	66.5135	1.73933	0.418901	8.20741	0.847017	0.624848	1.4556	0.0018042	0.0825609	0.175472	1.76537
MEAN	54.3128	29877.6	348.046	269.802	12.0841	8.28001	3.39928	2.72934	8.03048	15.5622	0.0350755	0.138444	0.399305	4.60803
MIN	53.1061	13900.4	37.1874	66.5135	1.44064	0.166339	1.34808	0.548509	0.281165	1.06124	0	0.0533485	0.113435	1.16645
MAX	55.677	40513.2	1750.03	517.656	71.5049	54.2971	8.20741	19.5578	74.7224	131.147	0.355782	0.211852	1.34281	24.7621
